# Supplementary material for: A density functional theory approach to mushroom-like platinum clusters on palladium-shell over Au core nanoparticles for high electrocatalytic activity
Source: Royal Society of Chemistry journal article supplement (doi:10.1039/c1cp20096h), 2011-01-01
Supplement: c1cp20096h.pdf [file c1cp20096h.pdf]

# A Density Functional Theory Approach to Unusually High Electrocatalytic Activity of Platinum Clusters on Palladium-Shell Nanoparticles

Sai Duan,<sup>a,b</sup> Ping-Ping Fang,<sup>a,c</sup> Feng-Ru Fan,<sup>a</sup> Ian Broadwell,<sup>a</sup> De-Yin Wu,<sup>a</sup> Bin Ren,<sup>a</sup> Christian Amatore,<sup>c</sup> Yi Luo,<sup>b</sup> Xin Xu,<sup>a</sup> and Zhong-Qun Tian<sup>a\*</sup>

Received (in XXX, XXX) Xth XXXXXXXXXX 200X, Accepted Xth XXXXXXXXXX 200X

First published on the web Xth XXXXXXXXXX 200X

DOI: 10.1039/b000000x

## S1 Additional TEM and HRTEM images of Au@Pd@Pt NPs

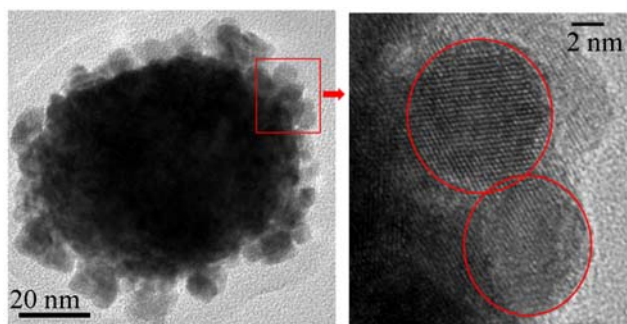

**Figure S1.** The TEM image (left) and the HRTEM (right) of the 55 nm Au@Pd@Pt NPs with 2 monolayers of Pd and  $\theta_{Pt} \sim 20$ .

As for the epitaxial growth of the Pd on Au NPs surface, we have explained it in our previous paper.<sup>1</sup> The SEM show clearly that Pt would grow by the cluster or island.

## S2 Bond displacement vector method

The Raman intensities should be calculated as<sup>2</sup>

$$I_{Raman} \propto \left| \frac{\partial \alpha}{\partial Q} \right|^2$$

where  $\alpha$  is the polarizabilities of considered system and  $Q$  the mass-weighted vibrational normal mode of specific frequencies. Generally, the  $Q$  would be expressed as

$$Q = \sum_i l_i q_i$$

where  $q = \sqrt{m_i} \Delta x_i$  is the mass-weighted Cartesian coordinate and  $l_i$  the corresponding displacement. Apply this, we have rewritten Raman intensities as

$$I_{Raman} \propto \left| \sum_i l_i \frac{\partial \alpha}{\partial q_i} \right|^2 = \left| \sum_i \frac{l_i}{\sqrt{m_i}} \frac{\partial \alpha}{\partial \Delta x_i} \right|^2$$

Here we only considered that  $Q$  is related to the C-O stretching. In this situation, the displacements belong to one CO molecules could be summarized first. As a result, we have

$$I_{Raman} \propto \left| \sum_i \frac{\vec{l}_i}{\sqrt{m_i}} \frac{\partial \alpha}{\partial \Delta S_i} \right|^2 = C \left| \sum_i \frac{\lambda_i \vec{l}_i}{\sqrt{m_i}} \right|^2$$

where  $\Delta S_i$  represents the CO bond length vector,  $\vec{l}_i$  the corresponding displacement vector,  $C$  the quantity of square of polarizability derivate corresponding specific C-O bond, and  $\lambda_i$  relative value between polarizability derivate corresponding arbitrary C-O bond and specific C-O bond. Here we ignored the mass different between oxygen and carbon atoms. This assumption would bring a relative error of 2.4% which is suitable for semi-quantitative analysis. The experimental observation show that the Raman intensity of CO molecules adsorbed on Pt atop sites is larger than it on Pd bridge sites. We considered this difference by an arbitrary factor  $\sqrt{3}$  for calculating Raman relative intensities. In more specifically,  $\lambda_i$  equals to 1 when  $\Delta S_i$  relate to PdC-O and  $\sqrt{3}$  to PtC-O. This method is called the bond displacement vector method in the text. Finally all calculated relative Raman intensities are memorialized to the same area.

## Notes and references

- <sup>a</sup> State Key Laboratory of Physical Chemistry of Solid Surfaces and LIA CNRS XiamENS "NanoBioChem", College of Chemistry and Chemical Engineering, Xiamen University, Xiamen 361005, China. Fax: + 86 592 2183047; Tel: + 86 592 2186979; E-mail: zqtian@xmu.edu.cn  
<sup>b</sup> Theoretical Chemistry, School of Biotechnology, Royal Institute of Technology, S-106 91 Stockholm, Sweden.

1. P. P. Fang, S. Duan, X. D. Lin, J. R. Anema, J. F. Li, O. Buriez, Y. Ding, F. R. W. Fan, D. Y., B. Ren, Z. L. Wang, C. Amatore and Z. Q. Tian, *Chem. Sci.*, 2011, DOI: 10.1039/c1030sc00489h.
2. W. Koch and M. C. Holthausen, *A Chemist's Guide to Density Functional Theory*, Wiley-VCH Verlag GmbH, 2001.
